# Supplementary material for: Octopus vulgaris (Cuvier, 1797) in the Mediterranean Sea: Genetic Diversity and Population Structure
Source: PubMed Central journal article supplement (PMC4755602; doi:10.1371/journal.pone.0149496), 2016-02-16
Supplement: pone.0149496.s003.pdf [file pone.0149496.s003.pdf]

83

- Alghero Italy (KC851988)
- Ancona Italy (KC852006)
- Olbia Italy (KC851985)
- Barcelona Spain (KC851970)
- Barcelona Spain (KC851965)
- Vigo Spain (KC851961)
- Vigo Spain (KC851960)
- Turkey (KC789315)
- Yumurtalik Turkey (KC311412)
- Port Elizabeth South Africa (HM104262)
- Amsterdam and Saint Paul Islands Southern Indian Ocean (FN424381)
- Amsterdam and Saint Paul Islands Southern Indian Ocean (FN424380)
- Amsterdam and Saint Paul Islands Southern Indian Ocean (FN424379)
- Spain Mediterranean Sea (DQ683227)
- Senegal Western Africa (DQ683226)
- Senegal Western Africa (DQ683225)
- Senegal Western Africa (DQ683224)
- Umhlanga South Africa (DQ683220)
- Durban South Africa (DQ683219)
- Durban South Africa (DQ683218)
- Durban South Africa (DQ683217)
- Durban South Africa (DQ683215)
- Port Elizabeth South Africa (DQ683213)
- Port Elizabeth South Africa (DQ683212)
- Struisbaai South Africa (DQ683210)
- Hout Bay South Africa (DQ683208)
- Tristan da Cunha Southern Atlantic Ocean (DQ683207)
- Tristan da Cunha Southern Atlantic Ocean (DQ683206)
- Tristan da Cunha Southern Atlantic Ocean (DQ683205)
- Strait of Messina 5 Italy (present study)
- Strait of Messina 4 Italy (present study)
- Strait of Messina 3 Italy (present study)
- Strait of Messina 2 Italy (present study)
- Strait of Messina 1 Italy (present study)
- Oristano 5 (present study)
- Oristano 3 Italy (present study)
- Oristano 2 Italy (present study)
- Oristano 1 Italy (present study)
- Spain 4 (present study)
- Spain 1 (present study)
- Croatia 5 (present study)
- Croatia 4 (present study)
- Croatia 3 (present study)
- Croatia 2 (present study)
- Croatia 1 (present study)
- Porto Cesareo 3 Italy (present study)
- Porto Cesareo 2 Italy (present study)
- Porto Cesareo 1 Italy (present study)
- Napoli 4 (NA2) Italy (present study)
- Napoli 3 (NA2) Italy (present study)
- Napoli 5 (NA1) Italy (present study)
- Alghero Italy (KC851989)
- Crete Greece (KC852003)
- Crete Greece (KC852005)
- Napoli 3 (NA1) Italy (present study)
- Porto Torres Italy (KC851986)
- Crete Greece (KC852004)
- Ancona Italy (KC852008)
- Barcelona Spain (KC851969)
- Alghero Italy (KC851991)
- Alghero Italy (KC851993)
- Alghero Italy (KC851992)
- Livorno Italy (KC851975)
- Livorno Italy (KC851977)
- Porto Santo Stefano Italy (KC851983)
- Porto Santo Stefano Italy (KC851981)
- Napoli Italy (KC851997)
- Livorno Italy (KC851973)
- Livorno Italy (KC851979)
- Napoli Italy (KC851994)
- Bragana Brasil (KF844027)
- Alghero Italy (KC851990)
- Vigo Spain (KC851957)
- Vigo Spain (KC851963)
- Porto Santo Stefano Italy (KC851982)
- Vigo Spain (KC851958)
- Napoli Italy (KC851995)
- Vigo Spain (KC851956)
- Vigo Spain (KC851959)
- Vigo Spain (KC851962)
- Livorno Italy (KC851974)
- Livorno Italy (KC851978)
- Porto Santo Stefano Italy (KC851980)
- Porto Santo Stefano Italy (KC851984)
- Napoli Italy (KC851996)
- Alanya Turkey (HQ908430)
- Barcelona Spain (KC851968)
- Barcelona Spain (KC851966)
- Napoli 2 (NA2) Italy (present study)
- Spain 2 (present study)
- Livorno Italy (KC851976)
- Napoli 1 (NA1) Italy (present study)
- Napoli 2 (NA1) Italy (present study)
- Napoli 4 (NA1) Italy (present study)
- Napoli 1 (NA2) Italy (present study)
- Napoli 5 (NA2) Italy (present study)
- Porto Cesareo 4 Italy (present study)
- Porto Cesareo 5 Italy (present study)
- Spain 3 (present study)
- Spain 5 (present study)
- Oristano 4 Italy (present study)
- Ria Formosa 1 Portugal (present study)
- Ria Formosa 2 Portugal (present study)
- Ria Formosa 3 Portugal (present study)
- Galicia Spain (DQ683221)
- Galicia Spain (DQ683222)
- Galicia Spain (DQ683223)
- Vigo Spain (KC851954)
- Vigo Spain (KC851955)
- Vigo Spain (KC851964)
- Barcelona Spain (KC851967)
- Alghero Italy (KC851987)
- Portugal (KF844042)
- Portugal (KF844043)
- Ria Formosa 4 Portugal (present study)
- Ria Formosa 5 Portugal (present study)
- Struisbaai South Africa (DQ683211)
- Yumurtalik Turkey (HQ908427)
- Turkey (KC789327)
- Turkey (KC789329)
- Turkey (KC789326)
- Turkey (KC789325)
- Turkey (KC789324)
- Yumurtalik Turkey (KC311409)
- Aydincik Turkey (HQ908429)
- Samandag Turkey (HQ908426)
- Yumurtalik Turkey (KC311406)
- Turkey (KC789316)
- Turkey (KC789317)
- Turkey (KC789318)
- Turkey (KC789319)
- Turkey (KC789320)
- Turkey (KC789321)
- Turkey (KC789322)
- Turkey (KC789323)
- Turkey (KC789328)
- Hout Bay South Africa (DQ683209)
- Ancona Italy (KC852007)
- Erdemli Turkey (HQ908428)
- Durban South Africa (DQ683214)
- Kemer Turkey (HQ908431)
- Durban South Africa (DQ683216)
- Fathiye Turkey (HQ908432)
- Yumurtalik Turkey (KC311410)
- Turkey (KC789330)
- Turkey (KC789331)
- Turkey (KC789332)
- Turkey (KC789333)
- Xiamen China (HQ846154)
- Yumurtalik Turkey (KC311411)
- Turkey (KC789314)
- Didim Turkey (HQ908436)
- Osaka Japan (AB191269)
- Japan (AB052253)
- Dalca Turkey (HQ908434)
- Marmaris Turkey (HQ908433)
- Turgutreis Turkey (HQ908435)
- Wenzhou China (HQ846110)
- Fujian East China (JX456270)
- Seto Inland Sea Japan (AB430546)
- Sagami Bay Japan (AB430547)

92

98

100

90

- Bragana Brasil (KF844030)
- Salvador Brasil (KF844031)
- Cabo Norte Brasil (KF844026)
- Bragana Brasil (KF844028)
- Bragana Brasil (KF844029)
- Rio de Janeiro Brasil (KF844032)
- Rio de Janeiro Brasil (KF844033)
- Rio de Janeiro Brasil (KF844034)
- Juria Brasil (KF844035)
- Cabo de Santa Marta Brasil (KF844040)
- Juria Brasil (KF844036)
- Juria Brasil (KF844037)
- Guaratuba Brasil (KF844038)
- Guaratuba Brasil (KF844039)
- Cabo de Santa Marta Brasil (KF844041)
- Octopus insularis (KF844009)
